# Supplementary material for: 11)3次元仮想空間における集団コミュニケーション環境の一検討(ヒューマンインフォメーション研究会)
Source: Royal Society of Chemistry journal article supplement (doi:10.1039/d3dt03805j), 1996-10-20
Supplement: d3dt03805j1.pdf [file d3dt03805j1.pdf]

## Electronic Supplementary Information

### **Amorphous bismuth and GO co-doped WO<sub>3</sub> electrochromic film with fast-switching time and long-term stability**

Jin You Zheng,<sup>a,b</sup> Qimeng Sun,<sup>a,b</sup> Huijing Yang,<sup>a,b</sup> Shuang Yu,<sup>a,b</sup> Mengsi Li,<sup>a</sup> Xiaomei Yu,<sup>\*a,b</sup> Chengduo Wang,<sup>c</sup> Tiantian Liu<sup>a,b</sup> and Songjie Li<sup>\*a,b</sup>

<sup>a</sup> *Engineering Research Center of Advanced Functional Material Manufacturing of Ministry of Education, School of Chemical Engineering, Zhengzhou University, Zhengzhou 450001, China. E-mail: Songjie@zzu.edu.cn, yuxm@zzu.edu.cn*

<sup>b</sup> *National Key Laboratory of Coking Coal Green Process Research, Zhengzhou University, Zhengzhou 450001, China*

<sup>c</sup> *School of Material Science and Engineering, Zhengzhou University, 100 Science Avenue, Zhengzhou 450001, China*

## **S1. Experimental Section**

### **1.1 Materials**

Tungstic acid ( $\text{H}_2\text{WO}_4$ , 99.9%), and bismuth (III) oxide ( $\text{Bi}_2\text{O}_3$ , 99.9%) were purchased from Aladdin<sup>®</sup>. Hydrogen peroxide ( $\text{H}_2\text{O}_2$ , 30%) from SCR<sup>®</sup>. Sulfuric acid ( $\text{H}_2\text{SO}_4$ , 95-98 wt%). Oxygenated graphene (GO, 4 mg/mL), Fluorine-doped tin oxide (FTO)-coated glass (sheet resistance: 6  $\Omega$ /sq) was purchased from South China Xiang Science & Technology Co., Ltd. The FTO-coated glass substrates (size: 30 × 20 × 2.2 mm) were cleaned with deionized (DI) water, ethanol, and DI water under sonication for each 15 min and finally dried in the atmosphere at room temperature before use.

### **1.2 Preparation of GO-Bi-WO<sub>3</sub>/FTO films**

Firstly, 15 g  $\text{H}_2\text{WO}_4$  was first dissolved in 100 mL of 30%  $\text{H}_2\text{O}_2$  via continually stirring for about 4 days, and the concentration of 0.3 mol/L transparent peroxotungstic acid ( $\text{H}_2\text{W}_2\text{O}_{11}$ , denoted as PTA) solution was obtained. Secondly,  $\text{Bi}_2\text{O}_3$  powder with a molar ratio of Bi: W  $\approx$  1: 30 was completely dissolved in the PTA solution at 80 °C water bath with magnetic stirring (300 rpm, about 8 h). Then withdraw 2 mL of the solution and add 100, 200, or 400  $\mu\text{L}$  of GO nanosheet dispersion (1 mg/mL), mix thoroughly heat at 80 °C for 4 h to obtain a homogeneous GO-Bi-PTA sol. The Bi-PTA sol with high concentration has a higher viscosity, which is conducive to preparing film by the spin-coating method.

Transparent GO-Bi-PTA film was formed by spin coating the GO-Bi-PTA sol on FTO glass with a speed of 1500 rpm for 40 s via a spin coater, and then annealing it at 300 °C for 2 h in the air via a muffle furnace. For comparison, the different Bi-WO<sub>3</sub> films were obtained by calcinating at different temperatures of 200 °C, 250 °C, 350 °C, and 400 °C for 2 h. To research the doping effect on electrochromic properties, the evaluations of the pure WO<sub>3</sub> (W), Bi-doped WO<sub>3</sub> (BW), and GO-Bi co-doped WO<sub>3</sub> (GBW) films were carried out.

### **1.3 Characterization**

X-ray diffraction (XRD, D8 Advance, Cu K $\alpha$ ) patterns were used to check the chemical structure and crystallinity of the films. Raman spectroscopy was recorded at ambient temperature on the LabRAM HR Evolution with a wavelength laser of 532 nm as the excitation source. An atomic force

microscope (AFM, BenYuan CSPM5500) and field-emission scanning electron microscope (SEM, FEI QUANTA FEG 250) with energy-dispersive spectroscopy (EDS, EDAX Element) were used to evaluate the morphology and elemental composition of the Bi-WO<sub>3</sub> film. X-ray photoelectron spectroscopy (XPS, Thermo Fisher K-Alpha) analyses were performed and calibrated by the binding energy of C1s 284.8 eV. with a wavelength laser of 514 nm as the excitation source.

Electrochemical and electrochromic measurements were conducted using an electrochemical workstation (CHI660e, Shanghai Chenhua Instrument, Inc.) at room temperature in a three-electrode system. The GO-Bi-WO<sub>3</sub>/FTO, an Ag/AgCl (with saturated KCl), and a Pt foil were used as working, reference, and counter electrodes, respectively. The electrolyte was 0.5 mol L<sup>-1</sup> H<sub>2</sub>SO<sub>4</sub>. The in-situ electrochromic and optical measurements were performed on the electrochemical workstation and an ultraviolet–visible (UV–vis) spectrometer (Thermo Scientific GENESYS 50). Cyclic voltammetry (CV) measurements were carried out from +0.5 V to -0.3 V at scan rates of 0.01~0.3 V/s. Chronoamperometry (CA) measurements were performed at -0.3 V for coloring and +0.5 V for bleaching and the duration for each step was 60 s. The coloration efficiencies were calculated at the wavelength of 630 nm.

## ***S2. Supplementary Figures***

According to previous research, it has been noted that the optical modulation range of crystalline WO<sub>3</sub> material is constrained and its response speed is sluggish.<sup>1</sup> As a result, the annealing temperature of 300 °C was selected. XRD pattern reveals that the thin film demonstrates an amorphous structure.

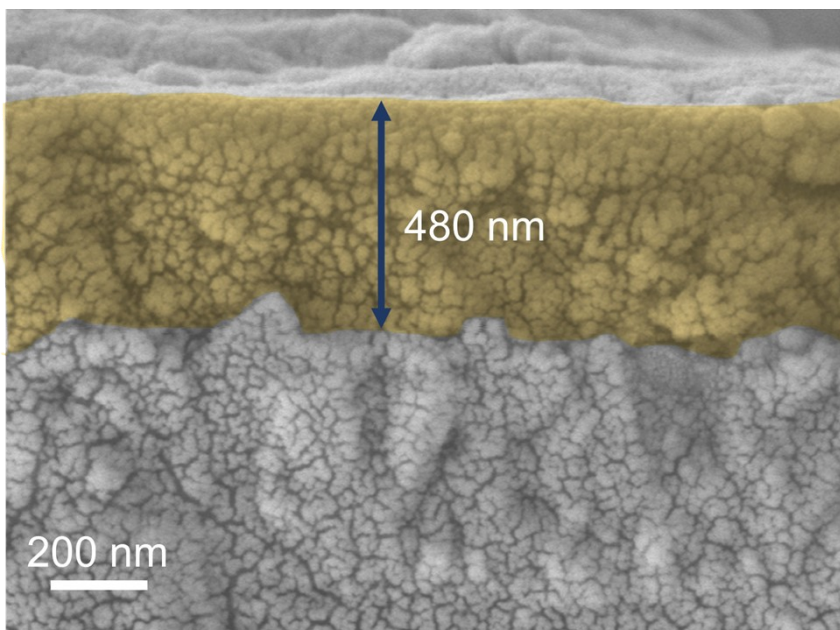

**Fig. S1** Cross-sectional SEM image of GBW-2 film.

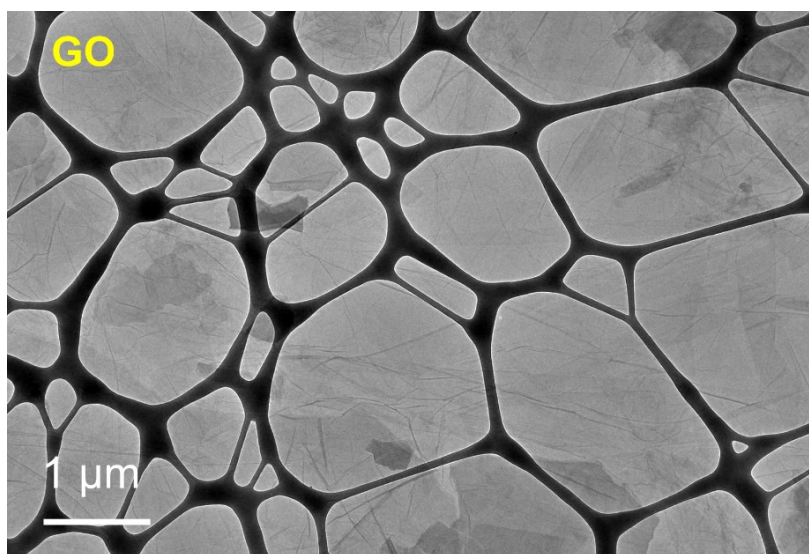

**Fig. S2** TEM image of GO nanosheets.

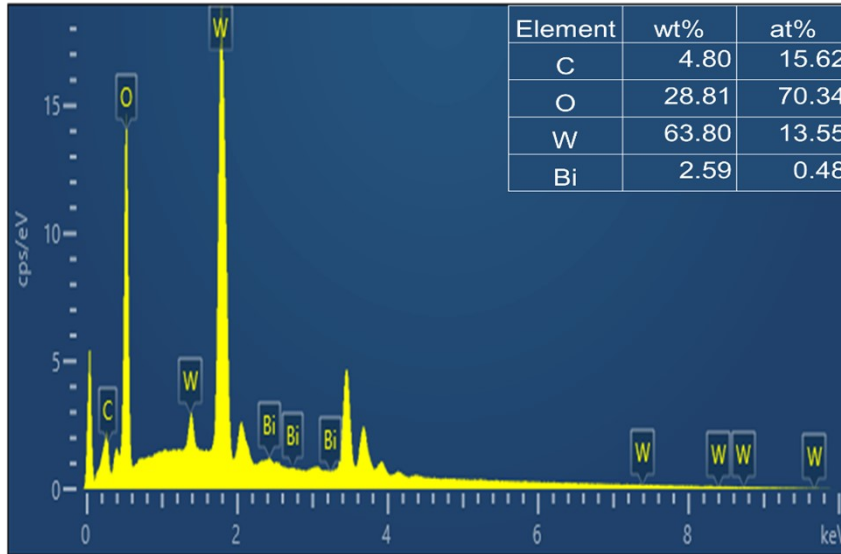

Fig. S3 EDS analysis of GBW-2 film.

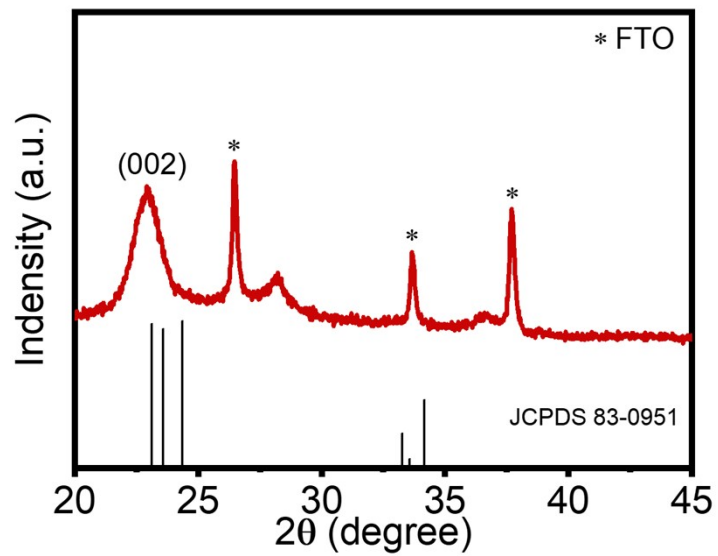

Fig. S4 XRD pattern of GBW-2 film.

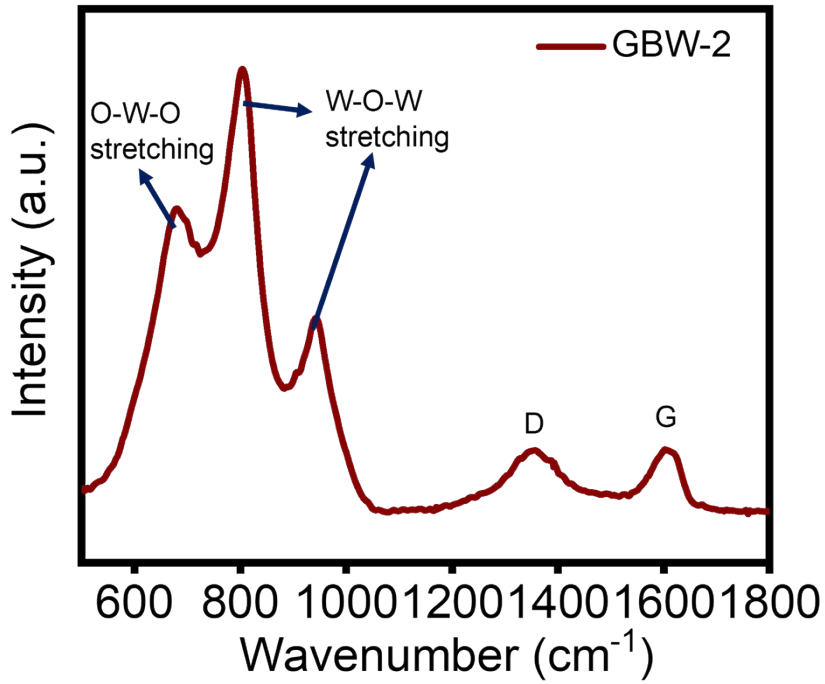

**Fig. S5** Raman spectra of GBW-2 film.

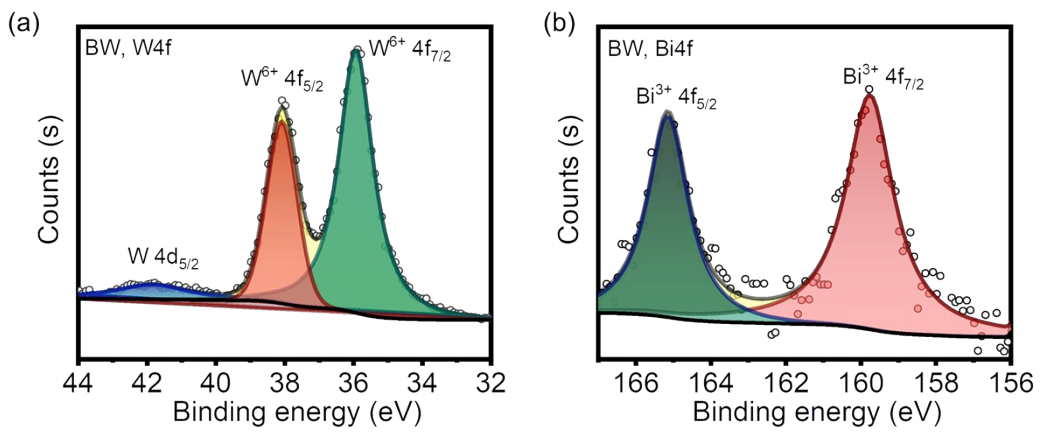

**Fig. S6** XPS spectra of (a) W 4f and (b) Bi 4f for the BW film.

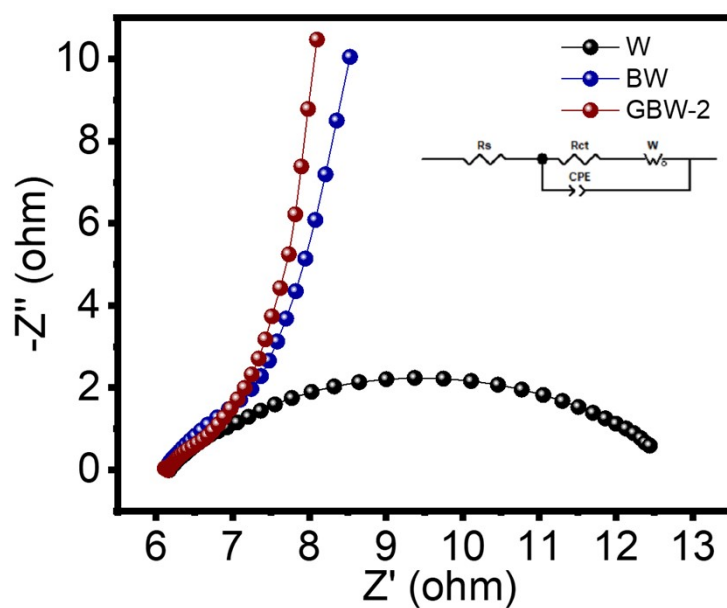

| Samples | $R_s$ | $R_{ct}$ |
|---------|-------|----------|
| W       | 6.195 | 6.51     |
| BW      | 6.138 | 2.96     |
| GBW     | 6.158 | 1.28     |

**Fig. S7** EIS curves and simulated  $R_s$  and  $R_{ct}$  values of GBW-2, BW, and W films.

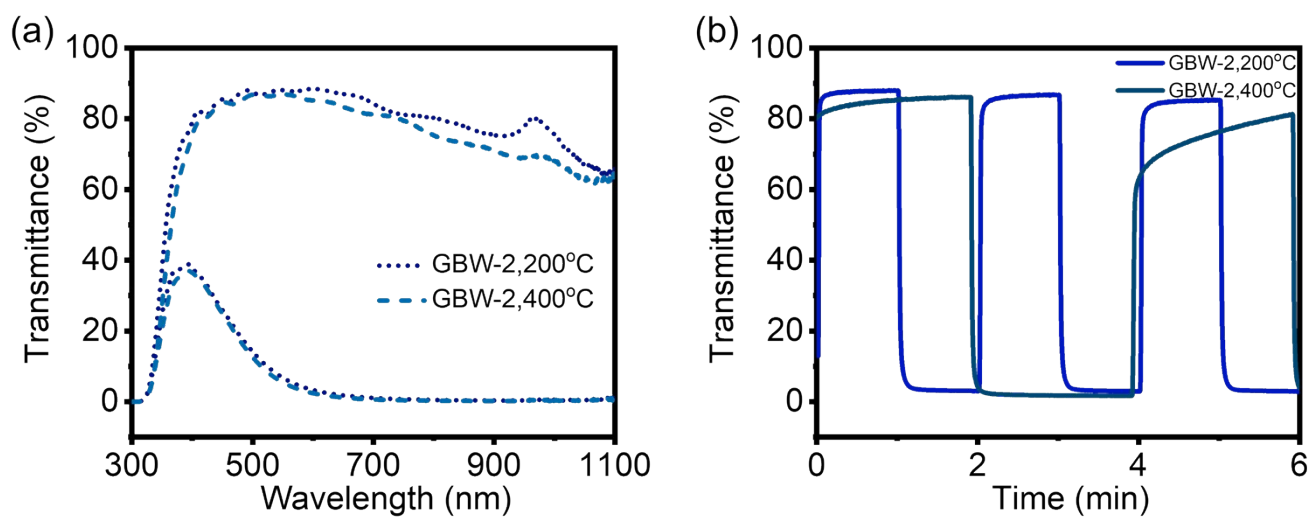

**Fig. S8** (a) Transmittance changes versus wavelength in the colored state ( $-0.3$  V) and bleached state ( $0.5$  V), and (b) *in-situ* transmittance curves at  $630$  nm under square wave potentials of  $-0.3$  V (coloring) and  $0.5$  V (bleaching) for  $60$  s of GBW-2 (annealing at  $200$  °C and  $400$  °C) films.

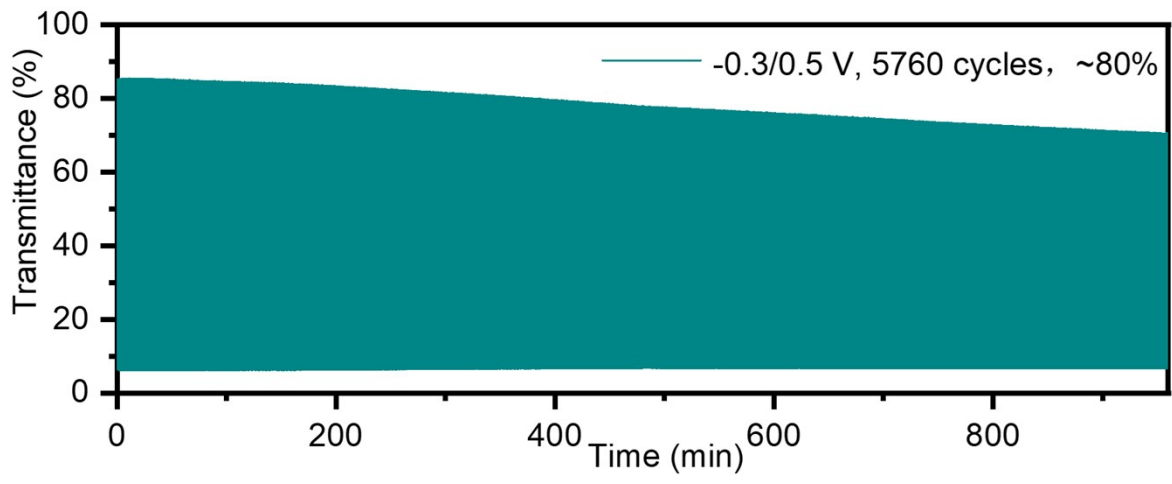

**Fig. S9** Long-term stability of GBW-2 film prepared by annealing at 200 °C.

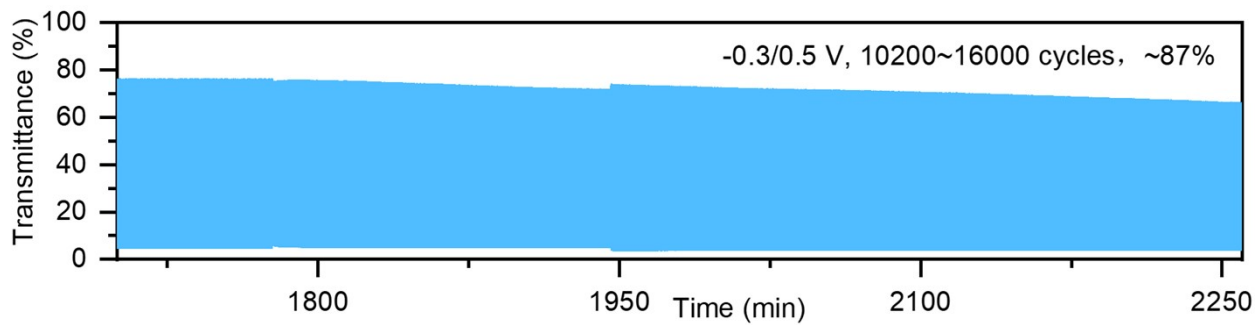

**Fig. S10** The switching response curve of GBW-2 thin film for cycles from 10200 to 16000 cycles.



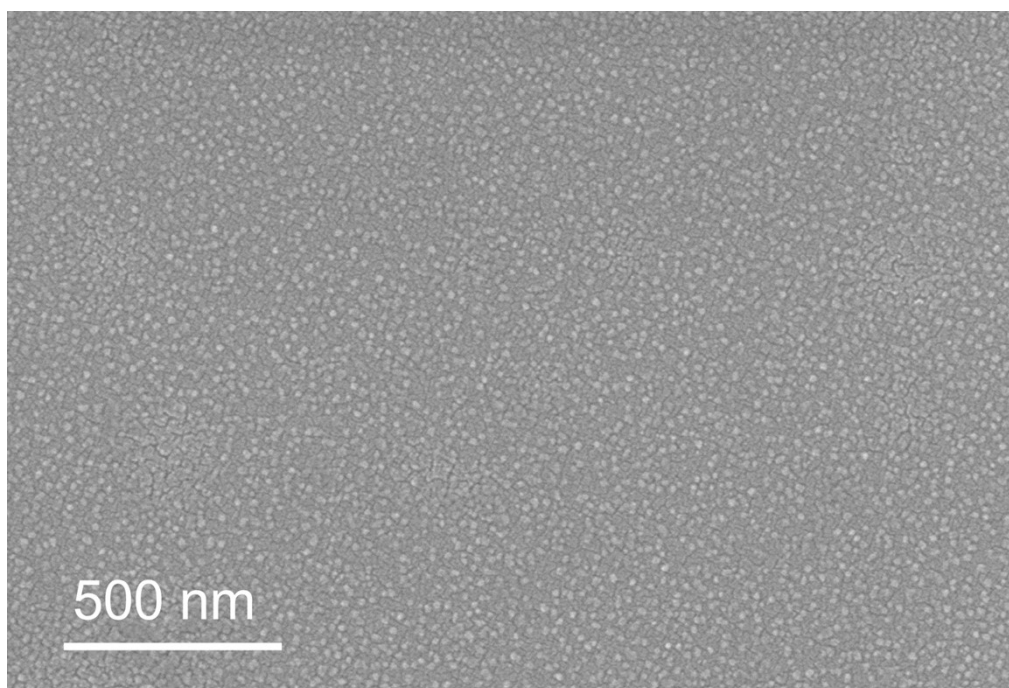

**Fig. S11** SEM image of GBW-2 after 16000 cycles.

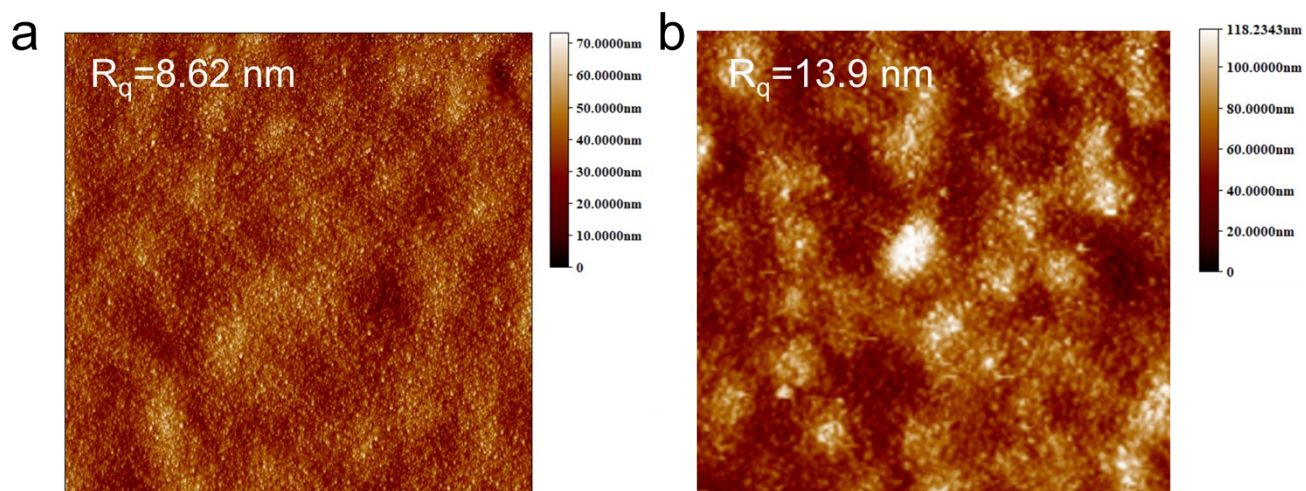

**Fig. S12** AFM images of GBW-2 (a) before and (b) after 16000 cycles

**Table S1** Comparison of the electrochromic performance of GBW-2 film with recent reports.

| Composition and phase,<br>film thickness (nm)            | Electrolyte ion  | $\Delta T$ (%) | $t_c, t_b$ (s) | CE ( $\text{cm}^2\text{C}^{-1}$ ) | Cycle stability | Ref       |
|----------------------------------------------------------|------------------|----------------|----------------|-----------------------------------|-----------------|-----------|
| GBW-2, 480                                               | $\text{H}^+$     | 85 (630 nm)    | 1.8,1.8        | 65.9                              | 10200, 86.4%    | This work |
| <i>c</i> - $\text{WO}_3/\text{rGO}$ , ~                  | $\text{Li}^+$    | 58.8 (633 nm)  | 4.7,4.5        | 122.2                             | 2500, ~         | 2         |
| <i>c</i> - $\text{WO}_3\text{-rGO}$ , 800                | $\text{Li}^+$    | 50 (632 nm)    | 5.3,6.2        | 386                               | 500, 90%        | 3         |
| <i>c</i> - $\text{W}_{18}\text{O}_{49}/\text{rGO}$ , 244 | $\text{Al}^{3+}$ | ~55 (633 nm)   | 8,8.25         | 46                                | 4000,96%        | 4         |
| <i>a</i> - $\text{WO}_3$ , 296                           | $\text{Li}^+$    | 75.7 (633 nm)  | 8.4,7.4        | 189.3                             | 1000, 75.5%     | 5         |
| <i>a</i> - $\text{WO}_3^*$ , 300                         | $\text{H}^+$     | 90 (650 nm)    | 0.7,7.1        | 109                               | 3000, 90%       | 6         |
| <i>a</i> -Tb- $\text{WO}_3$ , 410                        | $\text{H}^+$     | 66.71 (680 nm) | 9.99,3.7       | 48.33                             | 600, ~          | 7         |
| <i>h</i> -Sm- $\text{WO}_3/\text{P}_1$ , 750             | $\text{H}^+$     | 68.5 (633 nm)  | 7.4,2.9        | 72.7                              | 5000, 90.2%     | 8         |
| <i>c</i> -Ti- $\text{WO}_3$ , 283                        | $\text{Li}^+$    | 84.9 (633 nm)  | 25,3.3         | 114.9                             | 1000, 89%       | 9         |
| <i>c</i> - $\text{WO}_3@\text{GQD}^*$ , ~                | $\text{Li}^+$    | 78.72 (700 nm) | 4.1,4.6        | 78                                | 10000, 90%      | 10        |
| $\text{W}_{17}\text{O}_{47}@\text{PEDOT:PSS}$ , ~        | $\text{Li}^+$    | 79.7 (633 nm)  | 3.5,5.5        | 90.1                              | 12400, 76%      | 11        |
| P-CQD/ <i>a</i> - $\text{WO}_3$ , ~                      | $\text{Li}^+$    | 62.5 (633 nm)  | 4.4,2.7        | 76.1                              | 4000, 87.3%     | 12        |
| <i>a/c</i> - $\text{WO}_3$ , ~                           | $\text{Li}^+$    | 84.5 (633 nm)  | 1.2,3.6        | 83.6                              | 3000, 91.9%     | 13        |

\*: The performances were measured in the electrochromic devices.

## References

- 1 Q. Sun, S. Li, X. Yu, Y. Zhang, T. Liu and J. Y. Zheng, *Appl. Surf. Sci.*, 2023, **641**, 158510.
- 2 A. Khan, N. Y. Bhosale, S. S. Mali, C. K. Hong and A. V. Kadam, *J. Colloid Interface Sci.*, 2020, **571**, 185–193.
- 3 S. Bhattacharjee, S. Sen, S. Samanta and S. Kundu, *Electrochim. Acta*, 2022, **427**, 140820.
- 4 M. Hassan, G. Abbas, Y. Lu, Z. Wang and Z. Peng, *J. Mater. Chem. A*, 2022, **10**, 4870–4880.
- 5 S. Zhang, Y. Peng, J. Zhao, Z. Fan, B. Ding, J. Y. Lee, X. Zhang and Y. Xuan, *Adv. Opt. Mater.*, 2023, **11**, 2202115.
- 6 Z. Shao, A. Huang, C. Ming, J. Bell, P. Yu, Y.-Y. Sun, L. Jin, L. Ma, H. Luo, P. Jin and X.

- Cao, *Nat. Electron.*, 2022, **5**, 45–52.
- 7 L. Shen, J. Zheng and C. Xu, *Nanoscale*, 2019, **11**, 23049–23057.
- 8 H. Liu, Y. Wang, H. Wang, H. Xie, Y. Li, P. Zou, J. Zeng, T. Liang and X. Qi, *J. Colloid Interface Sci.*, 2023, **649**, 510–518.
- 9 Q. Meng, S. Cao, J. Guo, Q. Wang, K. Wang, T. Yang, R. Zeng, J. Zhao and B. Zou, *J. Energy Chem.*, 2023, **77**, 137–143.
- 10 K. Ahmad, G. Song and H. Kim, *ACS Sustain. Chem. Eng.*, 2022, **10**, 11948–11957.
- 11 Q. Zhao, J. Wang, X. Ai, Y. Duan, Z. Pan, S. Xie, J. Wang and Y. Gao, *InfoMat*, 2022, **4**, e12298.
- 12 M. H. Jo, K. H. Kim and H. J. Ahn, *Chem. Eng. J.*, 2022, **445**, 136826.
- 13 K. Tang, Y. Zhang, Y. Shi, J. Cui, X. Shu, Y. Wang, Y. Qin, J. Liu, H. H. Tan and Y. Wu, *Appl. Surf. Sci.*, 2019, **498**, 143796.
